# Supplementary material
Source: publisher figshare collection journal article supplement (https://rs.figshare.com/ndownloader/files/14876750)
Supplement: Supplementary file 1 [file 14876750]

## Sheet: Sheet1
Supplementary Table 1 for "Natural history-derived phenomics and comparative genomics as tools for studying evolutionary convergence" by Lamichhaney et al.
Searches 1 and 2 include data for Web of Science Core Collection
Search 1
Year	Total Convergence Papers*	Convergence + Genomics	Convergence + Museum	Convergence + Museum + genomics	*For this search publications (> 15,000) were restricted to 7 categories, so as not to include lots of papers on engineering and computer science. So these numbers are actually a bit lower than for Search 4, where we did not need to exclude any papers because the search terms were more specific
2009	278	73	68	1	*The 7 categories used were Evolutionary Biology, Genetics/Heredity, Multidisciplinary Sciences, Ecology, Zoology, Biology, and Plant Sciences
2010	281	81	72	6
2011	316	90	64	9
2012	380	116	78	11
2013	375	109	90	6
2014	451	136	98	11
2015	475	165	116	13
2016	467	160	101	9
2017	535	200	130	14
Total	3558	1130	817	80
			0.242991	0.07	0.288077
Search 2			Fraction of total convergence papers with museum authors	Fraction of total convergence + genomics papers with museum authors
Year	Total Convergence Papers	Convergence + Genomics	Convergence + Museum	Convergence + Museum + genomics
2009	298	51	40	1
2010	297	58	42	6
2011	335	75	45	7
2012	391	98	47	7
2013	378	95	54	4
2014	442	116	42	8
2015	428	137	52	6
2016	443	144	50	6
2017	522	177	59	10
Total	3534	951	431	55
			0.121958	0.0578339	0.474211
			Fraction of total convergence papers with museum authors	Fraction of total convergence + genomics papers with museum authors
In Pubmed
Search 3	"convergen*" AND "evolution"
Year	Total Convergence Papers	Convergence + Genomics	Convergence + Museum	Convergence + Museum + genomics
2009	239	50	7	1
2010	237	53	14	2
2011	245	59	9	3
2012	308	71	10	2
2013	330	68	13	0
2014	380	75	29	5
2015	405	109	55	9
2016	385	81	50	6
2017	494	139	64	11
Total	3023	705	251	39
			0.0830301	0.0553191	0.666254
			Fraction of total convergence papers with museum authors	Fraction of total convergence + genomics papers with museum authors
In Pubmed
Search 4	"convergent evolution" OR "parallel evolution"
Year	Total Convergence Papers	Convergence + Genomics	Convergence + Museum	Convergence + Museum + genomics
2009	166	34	6	2
2010	148	28	9	3
2011	183	52	9	3
2012	181	40	5	0
2013	226	53	7	0
2014	262	75	17	3
2015	266	90	22	4
2016	251	78	29	6
2017	319	115	34	7
Total	2002	565	138	28
			0.0689311	0.0495575	0.718943
			Fraction of total convergence papers with museum authors	Fraction of total convergence + genomics papers with museum authors
In all cases, to get addresses of authors in the "Museum": columns add Affiliation: Museum or Museo or Musee
To capture papers on genomics of convergence, we added "genom*" as an additional topic keyword.
